# Supplementary material
Source: PubMed Central journal article supplement (PMC9808503)

**A**

Minimum Anchor

★ Maximum # of soft-clipped bases

☆ Minimum # of soft-clipped bases

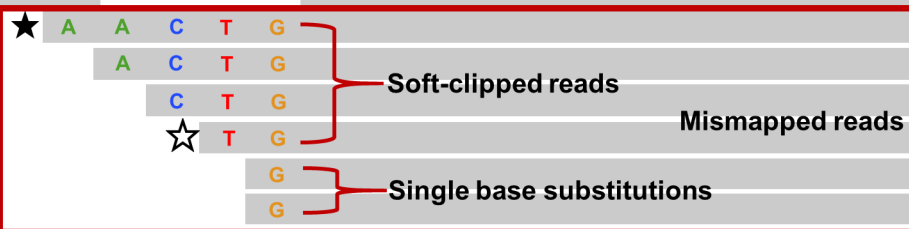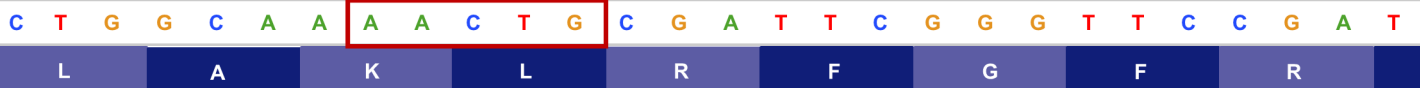**B**

Minimum Anchor

★ Maximum # of soft-clipped bases

☆ Minimum # of soft-clipped bases

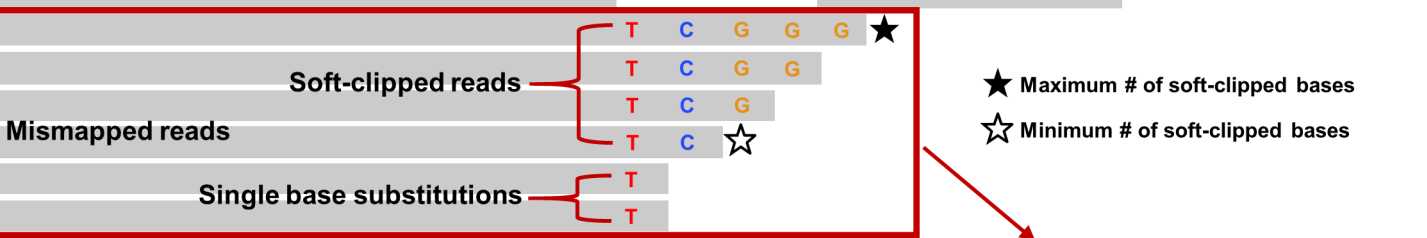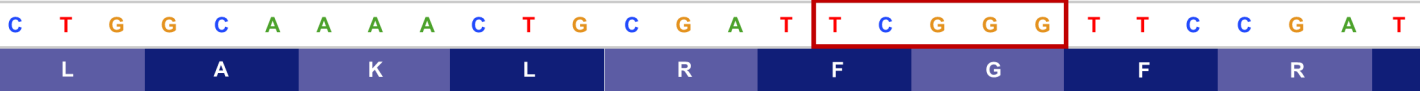

Supplement: mmc1.pdf [file mmc1.pdf]
