# Supplementary material
Source: PubMed Central journal article supplement (PMC9808503)

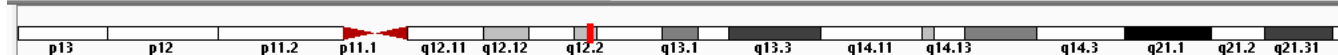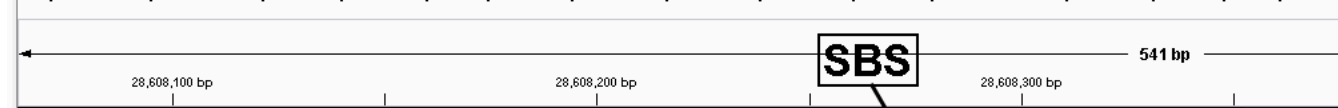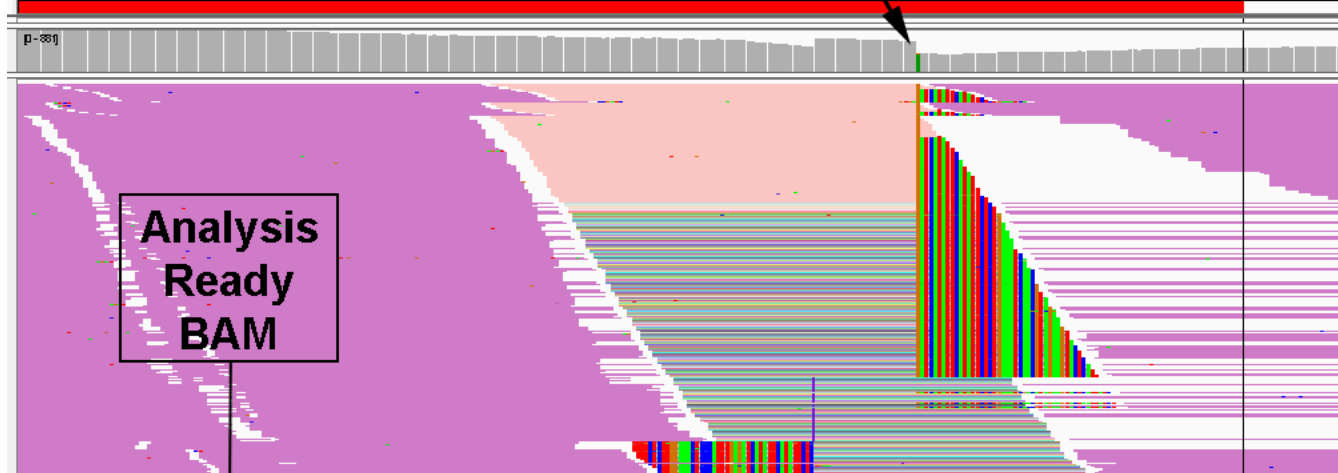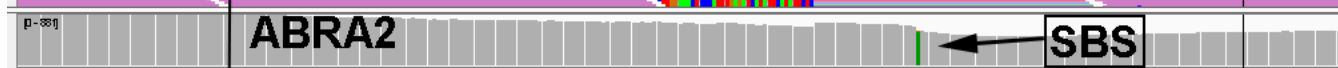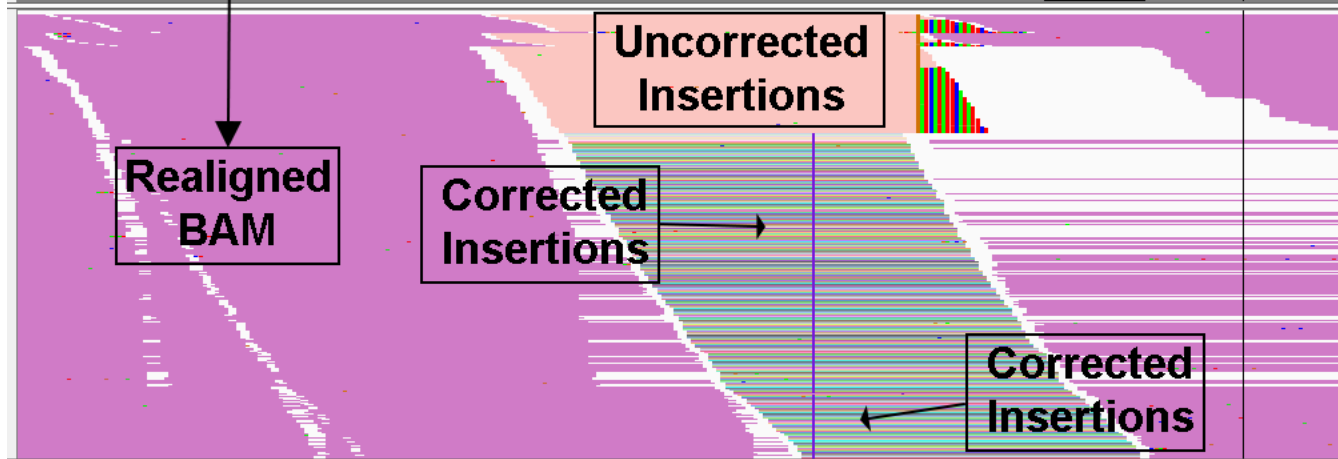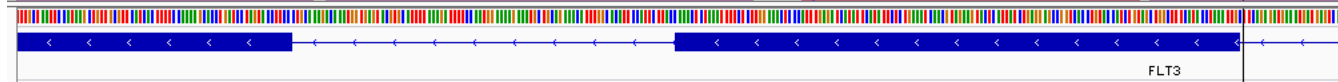

Supplement: mmc3.pdf [file mmc3.pdf]

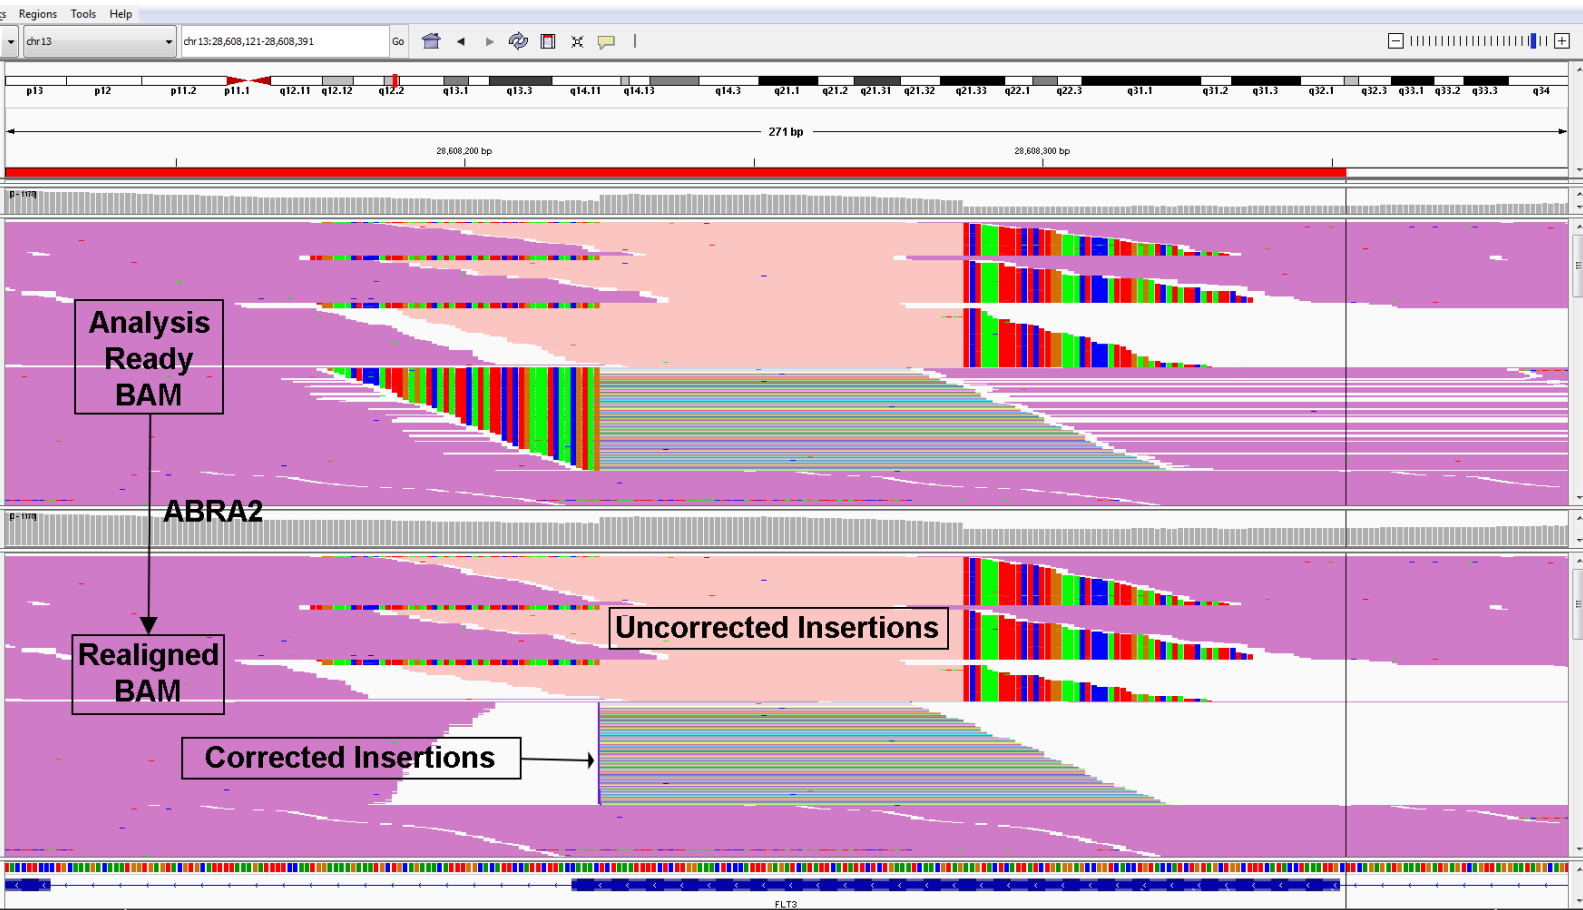

Supplement: mmc4.pdf [file mmc4.pdf]

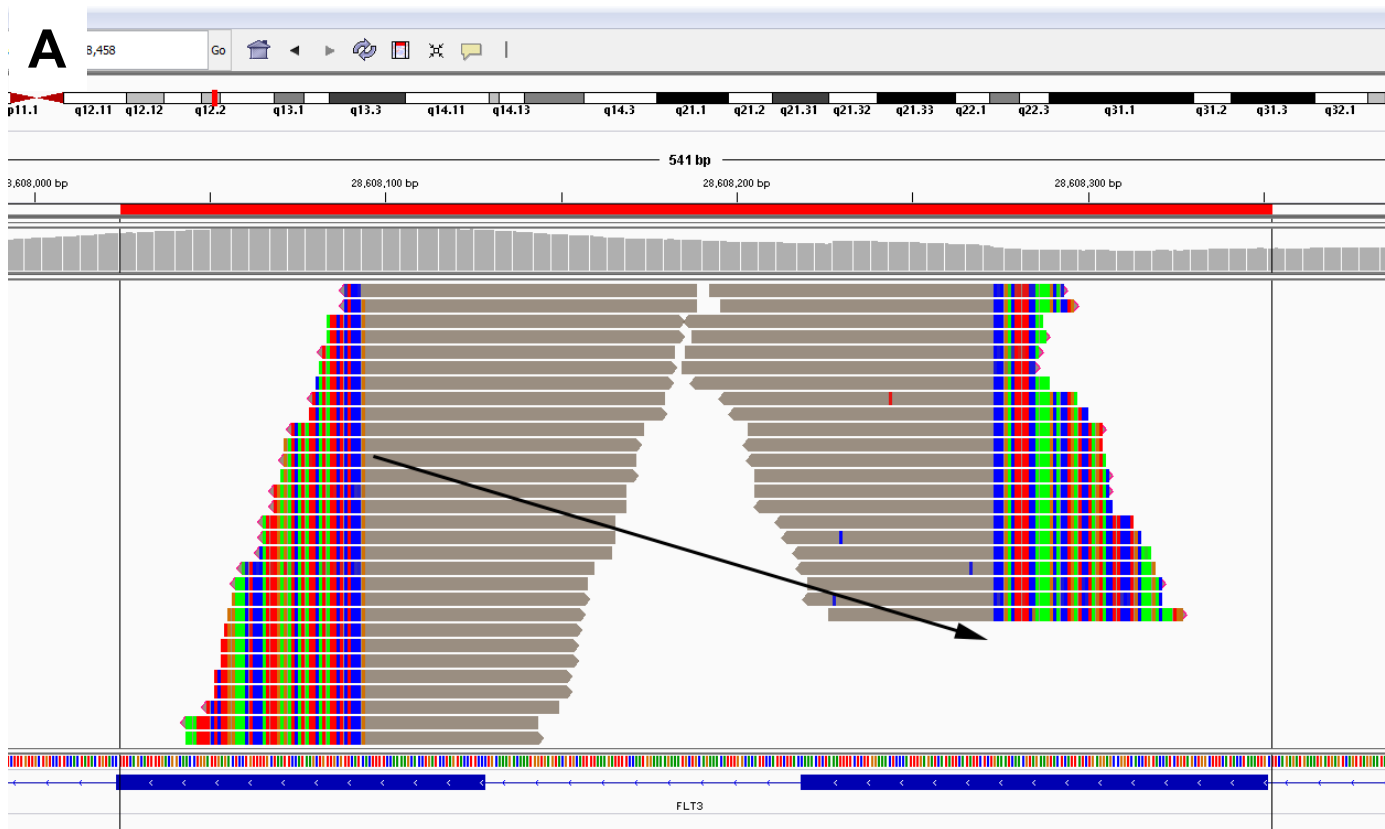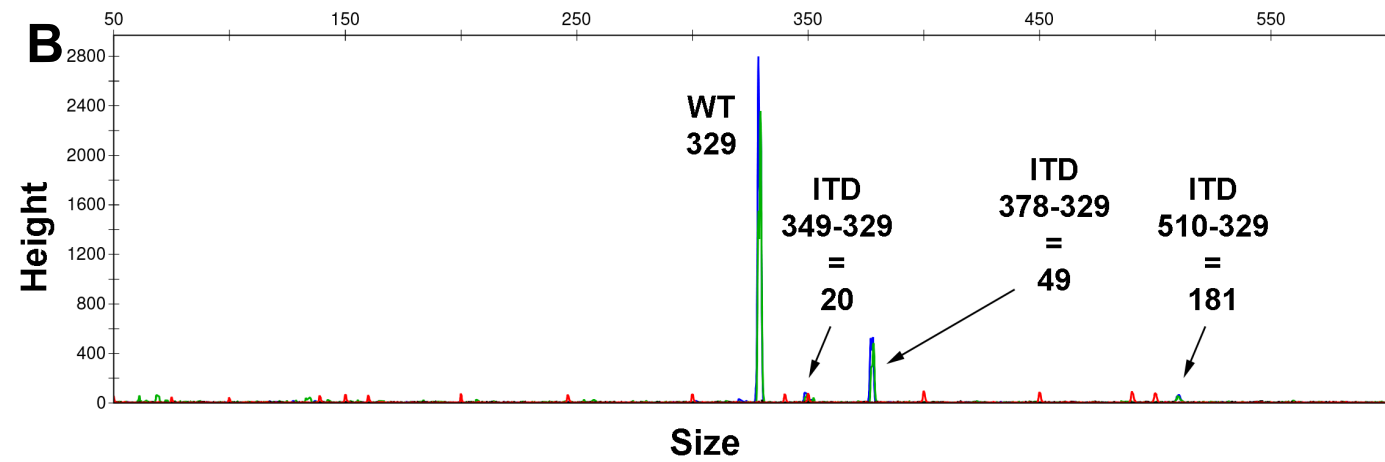

Supplement: mmc5.pdf [file mmc5.pdf]

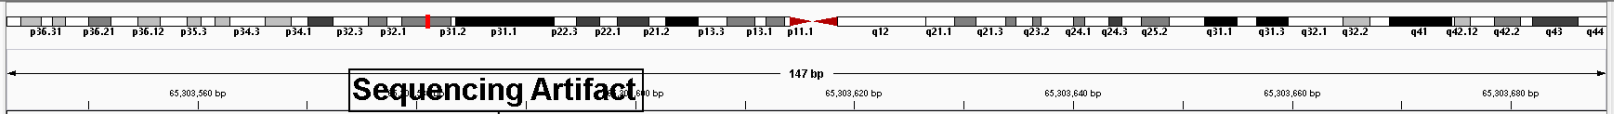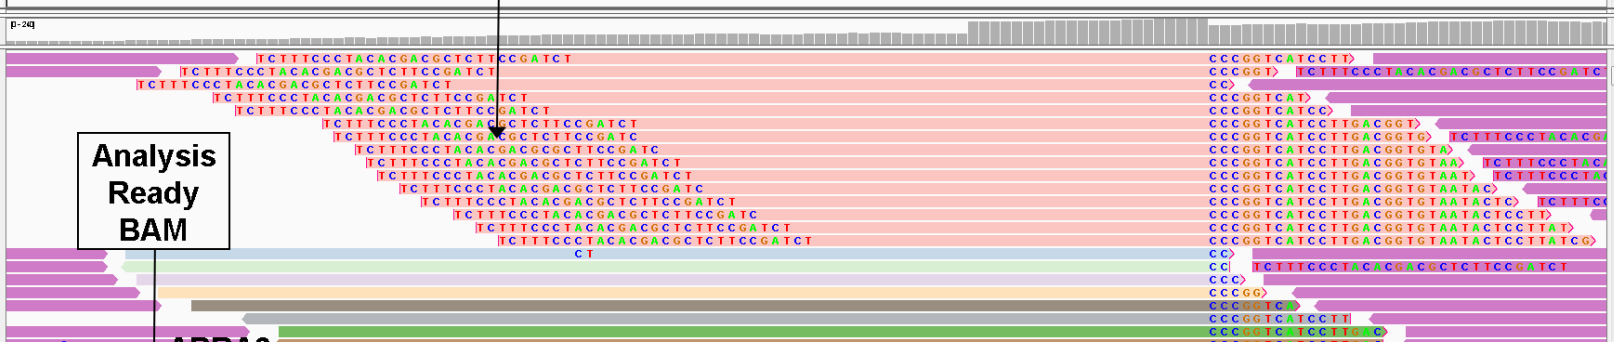

Analysis Ready BAM

Realigned BAM

Uncorrected Insertions

Corrected Insertions

Supplement: mmc8.pdf [file mmc8.pdf]
